# Supplementary material for: Open-source Sub-Nanometer Stabilization System for Super-resolution Fluorescence Microscopy
Source: Research Square preprint supplement (doi:10.21203/rs.3.rs-6131181/v1), 2025-04-17
Supplement: Supplementary file 1 [file e6f41fb55e66669f531acd37.docx]

**Supplementary Information**

**Open-source Sub-Nanometer Stabilization System for Super-resolution Fluorescence Microscopy**

Florencia Edorna,1,2,# Florencia D. Choque,1,2,# Giovanni Ferrari,1,3 Luciano A. Masullo1§, Piotr Zdańkowski,1+ Guillermo Acuna,4,5 Philip Tinnefeld,3 Alan M. Szalai,1 Lucía F. Lopez, 1* Andrés Zelcer, 1* and Fernando D. Stefani1,2

1 Centro de Investigaciones en Bionanociencias (CIBION), Consejo Nacional de Investigaciones Científicas y Técnicas (CONICET), Godoy Cruz 2390, C1425FQD Ciudad Autónoma de Buenos Aires, Argentina.

2 Departamento de Física, Facultad de Ciencias Exactas y Naturales, Universidad de Buenos Aires, Güiraldes 2620, C1428EHA Ciudad Autónoma de Buenos Aires, Argentina.

3 Department of Chemistry and Center for NanoScience, Ludwig-Maximilians-Universität München, Munich, Germany, Butenandtstraße 13, 81377.

4 Department of Physics, University of Fribourg, Chemin du Musée 3, Fribourg, CH-1700, Switzerland

5 Swiss National Center for Competence in Research (NCCR) Bio-inspired Materials, University of Fribourg, Chemin des Verdiers 4, CH-1700 Fribourg, Switzerland.

# These authors contributed equally to this work.

* Corresponding authors: lucia.lopez@conicet.gov.ar, andres.zelcer@cibion.conicet.gov.ar

§ Present address: Max Planck Institute of Biochemistry, Am Klopferspitz 18, 82152 Planegg, Germany

+ Present address: Warsaw University of Technology, Institute of Micromechanics and Photonics, A. Boboli 8, 02-525 Warsaw, Poland

Table of Contents

[Supplementary Text: Software description 2](#_Toc191647534)

[Supplementary Figures 5](#_Toc191647535)

[Figure S1. Sample X, Y and Z drifts of RASTMIN setup (non-stabilized). 5](#_Toc191647536)

[Figure S2. Sample X, Y and Z drifts of p-MINFLUX setup (non-stabilized). 6](#_Toc191647537)

[Figure S3. Sample X, Y and Z drifts of p-MINFLUX setup (Z stabilization only). 7](#_Toc191647538)

[Figure S4. Performance of the stabilization system in the 3 dimensions for the p-MINFLUX setup. 8](#_Toc191647539)

[Figure S5. p-MINFLUX measurement with no active stabilization. 9](#_Toc191647540)

[Supplementary Tables 9](#_Toc191647541)

# Supplementary Text: Software description

*Requirements and technical details*

The stabilization system only requires NumPy and SciPy packages. To use the provided GUI, PyQT5 and pyqtgraph are also required. We keep supporting Python from 3.7 onwards, as there are a lot of legacy programs that haven’t been updated to modern versions yet.

The stabilization loop runs on its own thread. The reference Python implementation (CPython) uses a Global Interpreter Lock (GIL) that makes it very easy for one thread of the same process to keep others from running. Therefore, care must be taken not to hog the CPU running large portions of Python code in another thread of the same process. Some libraries (notably numpy) release the GIL before performing many operations and will not interfere with the stabilization. As usual, I/O operations also release the GIL.

*Application Program Interface (API)*

The software provides a well-defined Application Program Interface (API) that controls the stabilization module. The provided GUI accesses this API to perform all required actions. Therefore, there is no need to directly access the API unless you want to implement a different GUI or use the stabilization software without one. The API provides methods for setting the ROIs, starting and stopping tracking and stabilization, initiating calibrations, adjusting the reference position, and adding callbacks for events like stabilization start and stop, and for each localization/tracking/correction cycle. See the documentation provided on the repository (https://github.com/Stefani-Lab/takyaq) for full description of the API. The main distinct features that are included are:

Calibration

To calibrate the pixel size of our imaging system, a reference sample can be used. In our laboratory, we use a high-quality reference grid sample (Thorlabs **R1L3S3P**). Our stabilization software offers a different, complementary possibility for calibration: using the piezo stage movement as the distance reference. The software will perform a series of controlled stage movements and localizations, reporting the results. In the case of X and Y calibration, the pixel size is reported.

In the case of the focus signal, one must always rely on the piezo movement as the distance reference. Depending on the relative position and angle of the focus beam with respect to the optical axis, the amount and direction of displacement of the reflection will vary. The procedure provided for Z calibration reports both values as the shift in nm per pixel and the direction as the angle from the +X direction. Therefore, the Z drift is determined using both the magnitude and direction of the reflected beam position shift. In this way, a maximum sensitivity is obtained as all available data is used.

Reference shift

Testing the performance of a super-resolution microscope is fundamental. A common procedure to test the resolving power is measuring the location of the same entity after performing small position shifts. In order to perform these movements keeping the precision provided by the stabilization, the software provides an instruction to shift the stabilization reference position while the stabilization is active, effectively forcing the stabilization system to move the stage. This feature provides a simple means to execute predefined patterns (e.g. square patterns with 20 nm sides).

Z-lock saving

Many techniques rely on structured illumination, with well-defined PSFs’ positions and shapes. Actually, in many cases like 2D MINFLUX or RASTMIN what is relevant is the PSF XY profile at the focus position. As small changes in the focus can lead to changes and shifts in the XY profile of the PSF, it is therefore necessary to ensure that the same axial position is used both for PSF characterization and for the actual measurements. Otherwise, using misleading PSFs’ profiles and/or relative positions within the excitation pattern would lead to undesired biased localizations. The program provides a function to save all relevant data (ROI, Z reflection center of mass position in the image) to perfectly recover the same focus position.

# Supplementary Figures


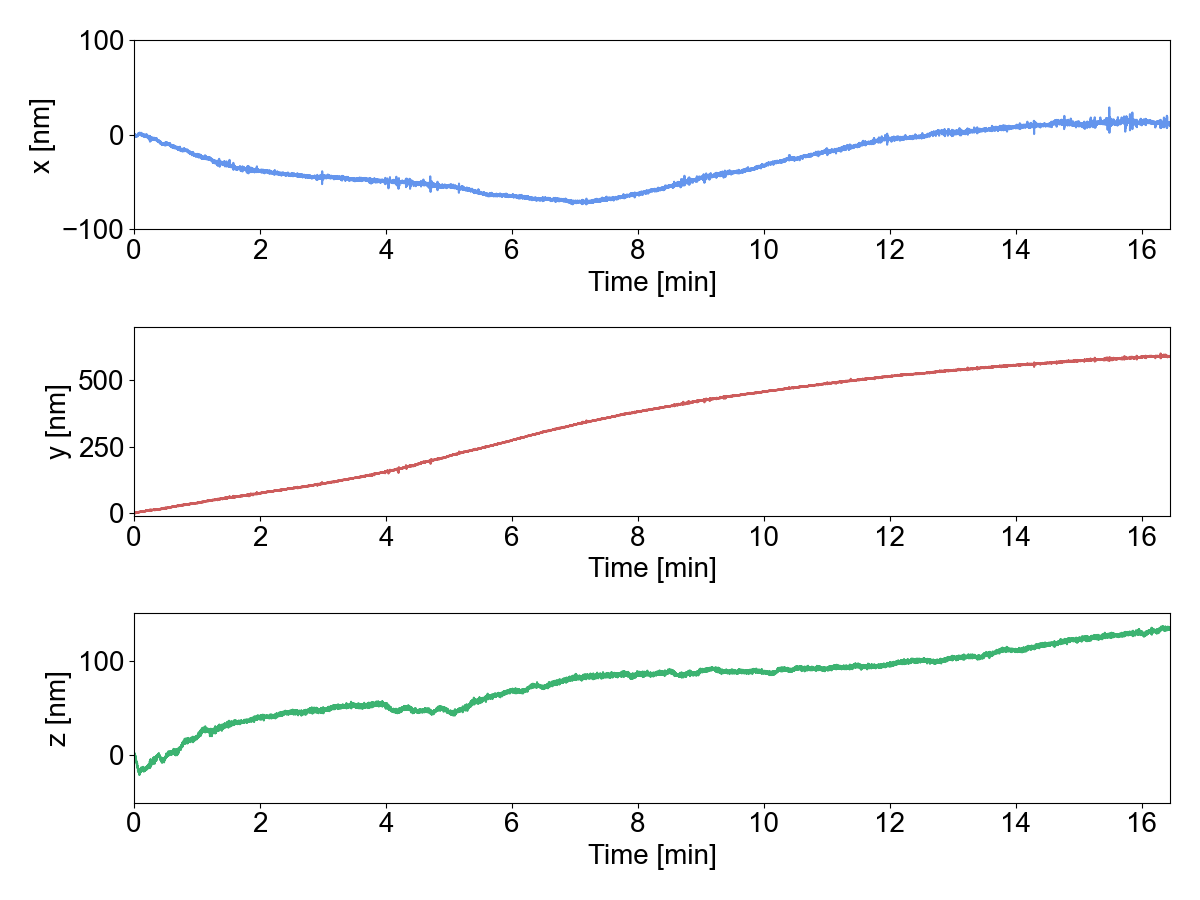


Figure S1. Sample X, Y and Z drifts of RASTMIN setup (non-stabilized). For X and Y, the average displacement shown corresponds to the tracking of 5 AuNPs.


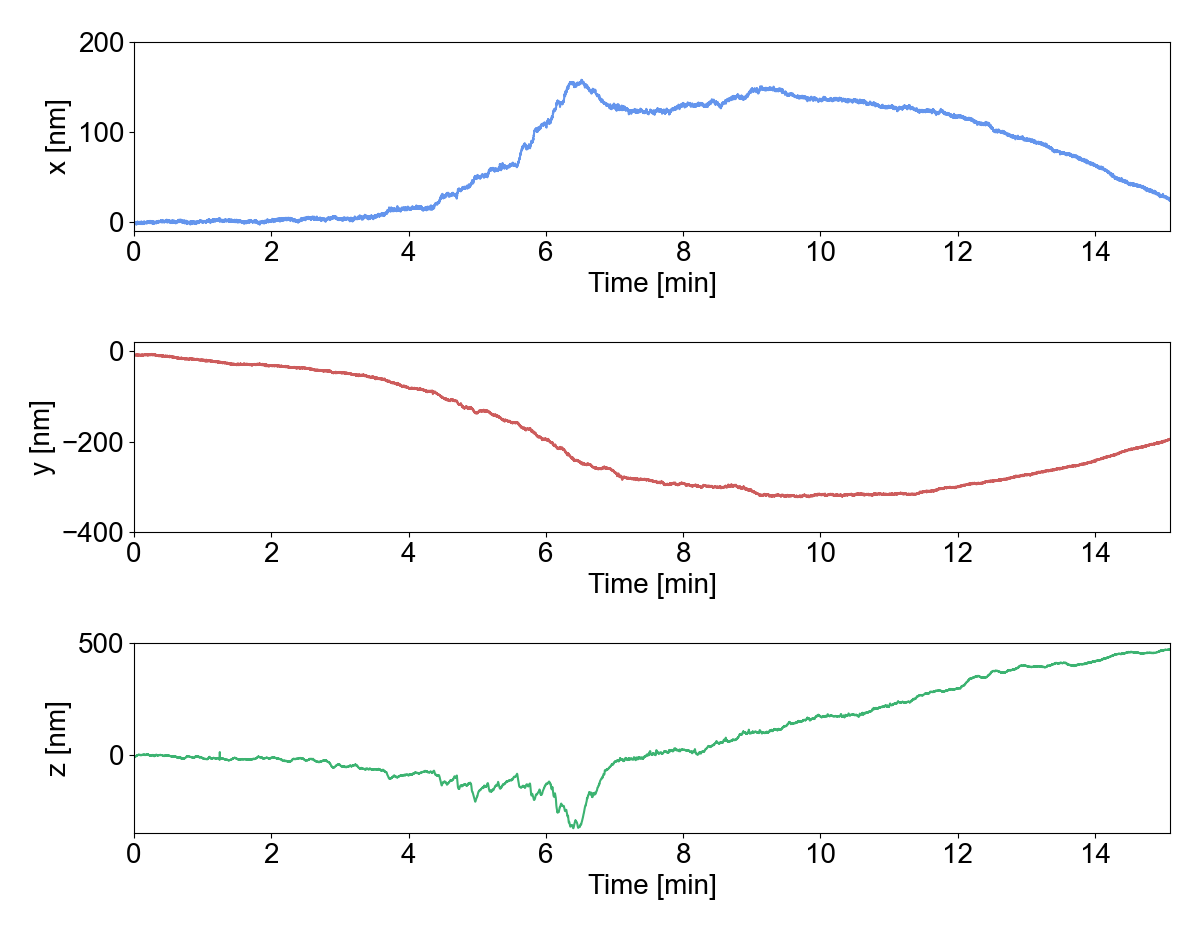


Figure S2. Sample X, Y and Z drifts of p-MINFLUX setup (non-stabilized). For X and Y, the average displacement shown corresponds to the tracking of 7 AuNPs.


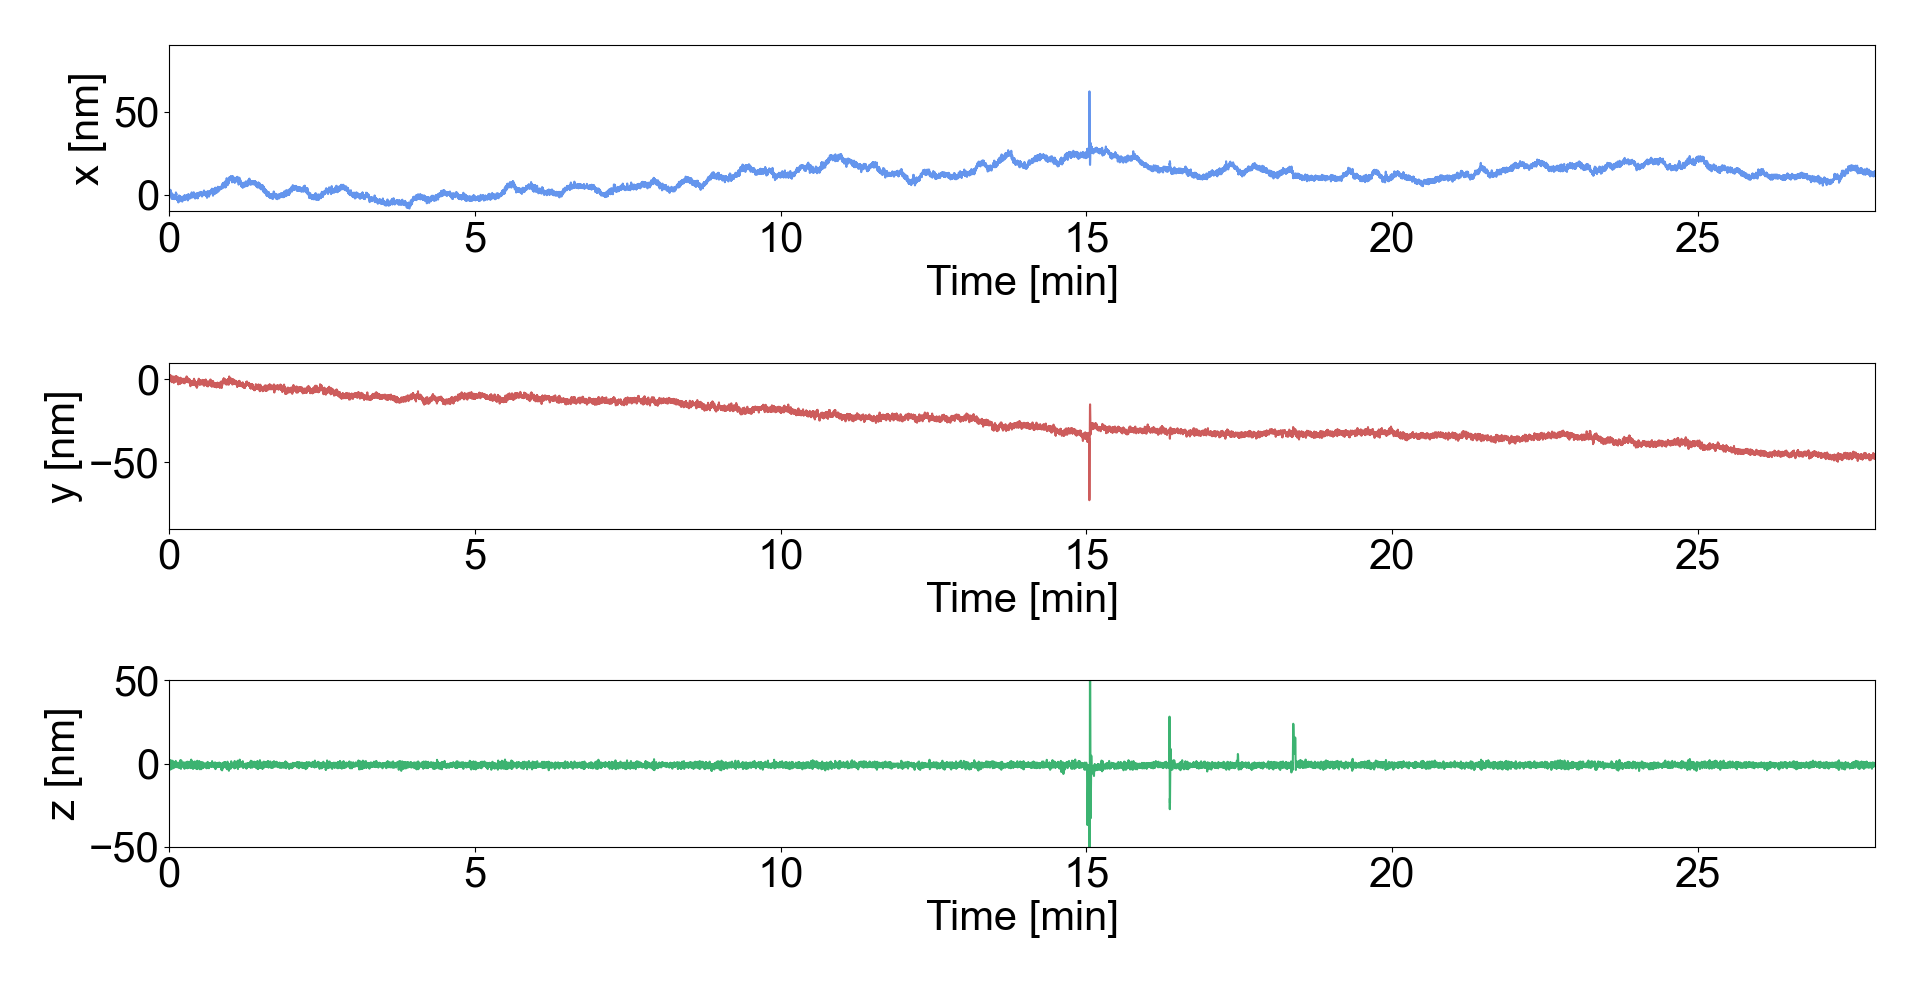


Figure S3. Sample X, Y and Z drifts of p-MINFLUX setup (Z stabilization only).For X and Y, the average displacement shown corresponds to the tracking of 6 AuNPs.


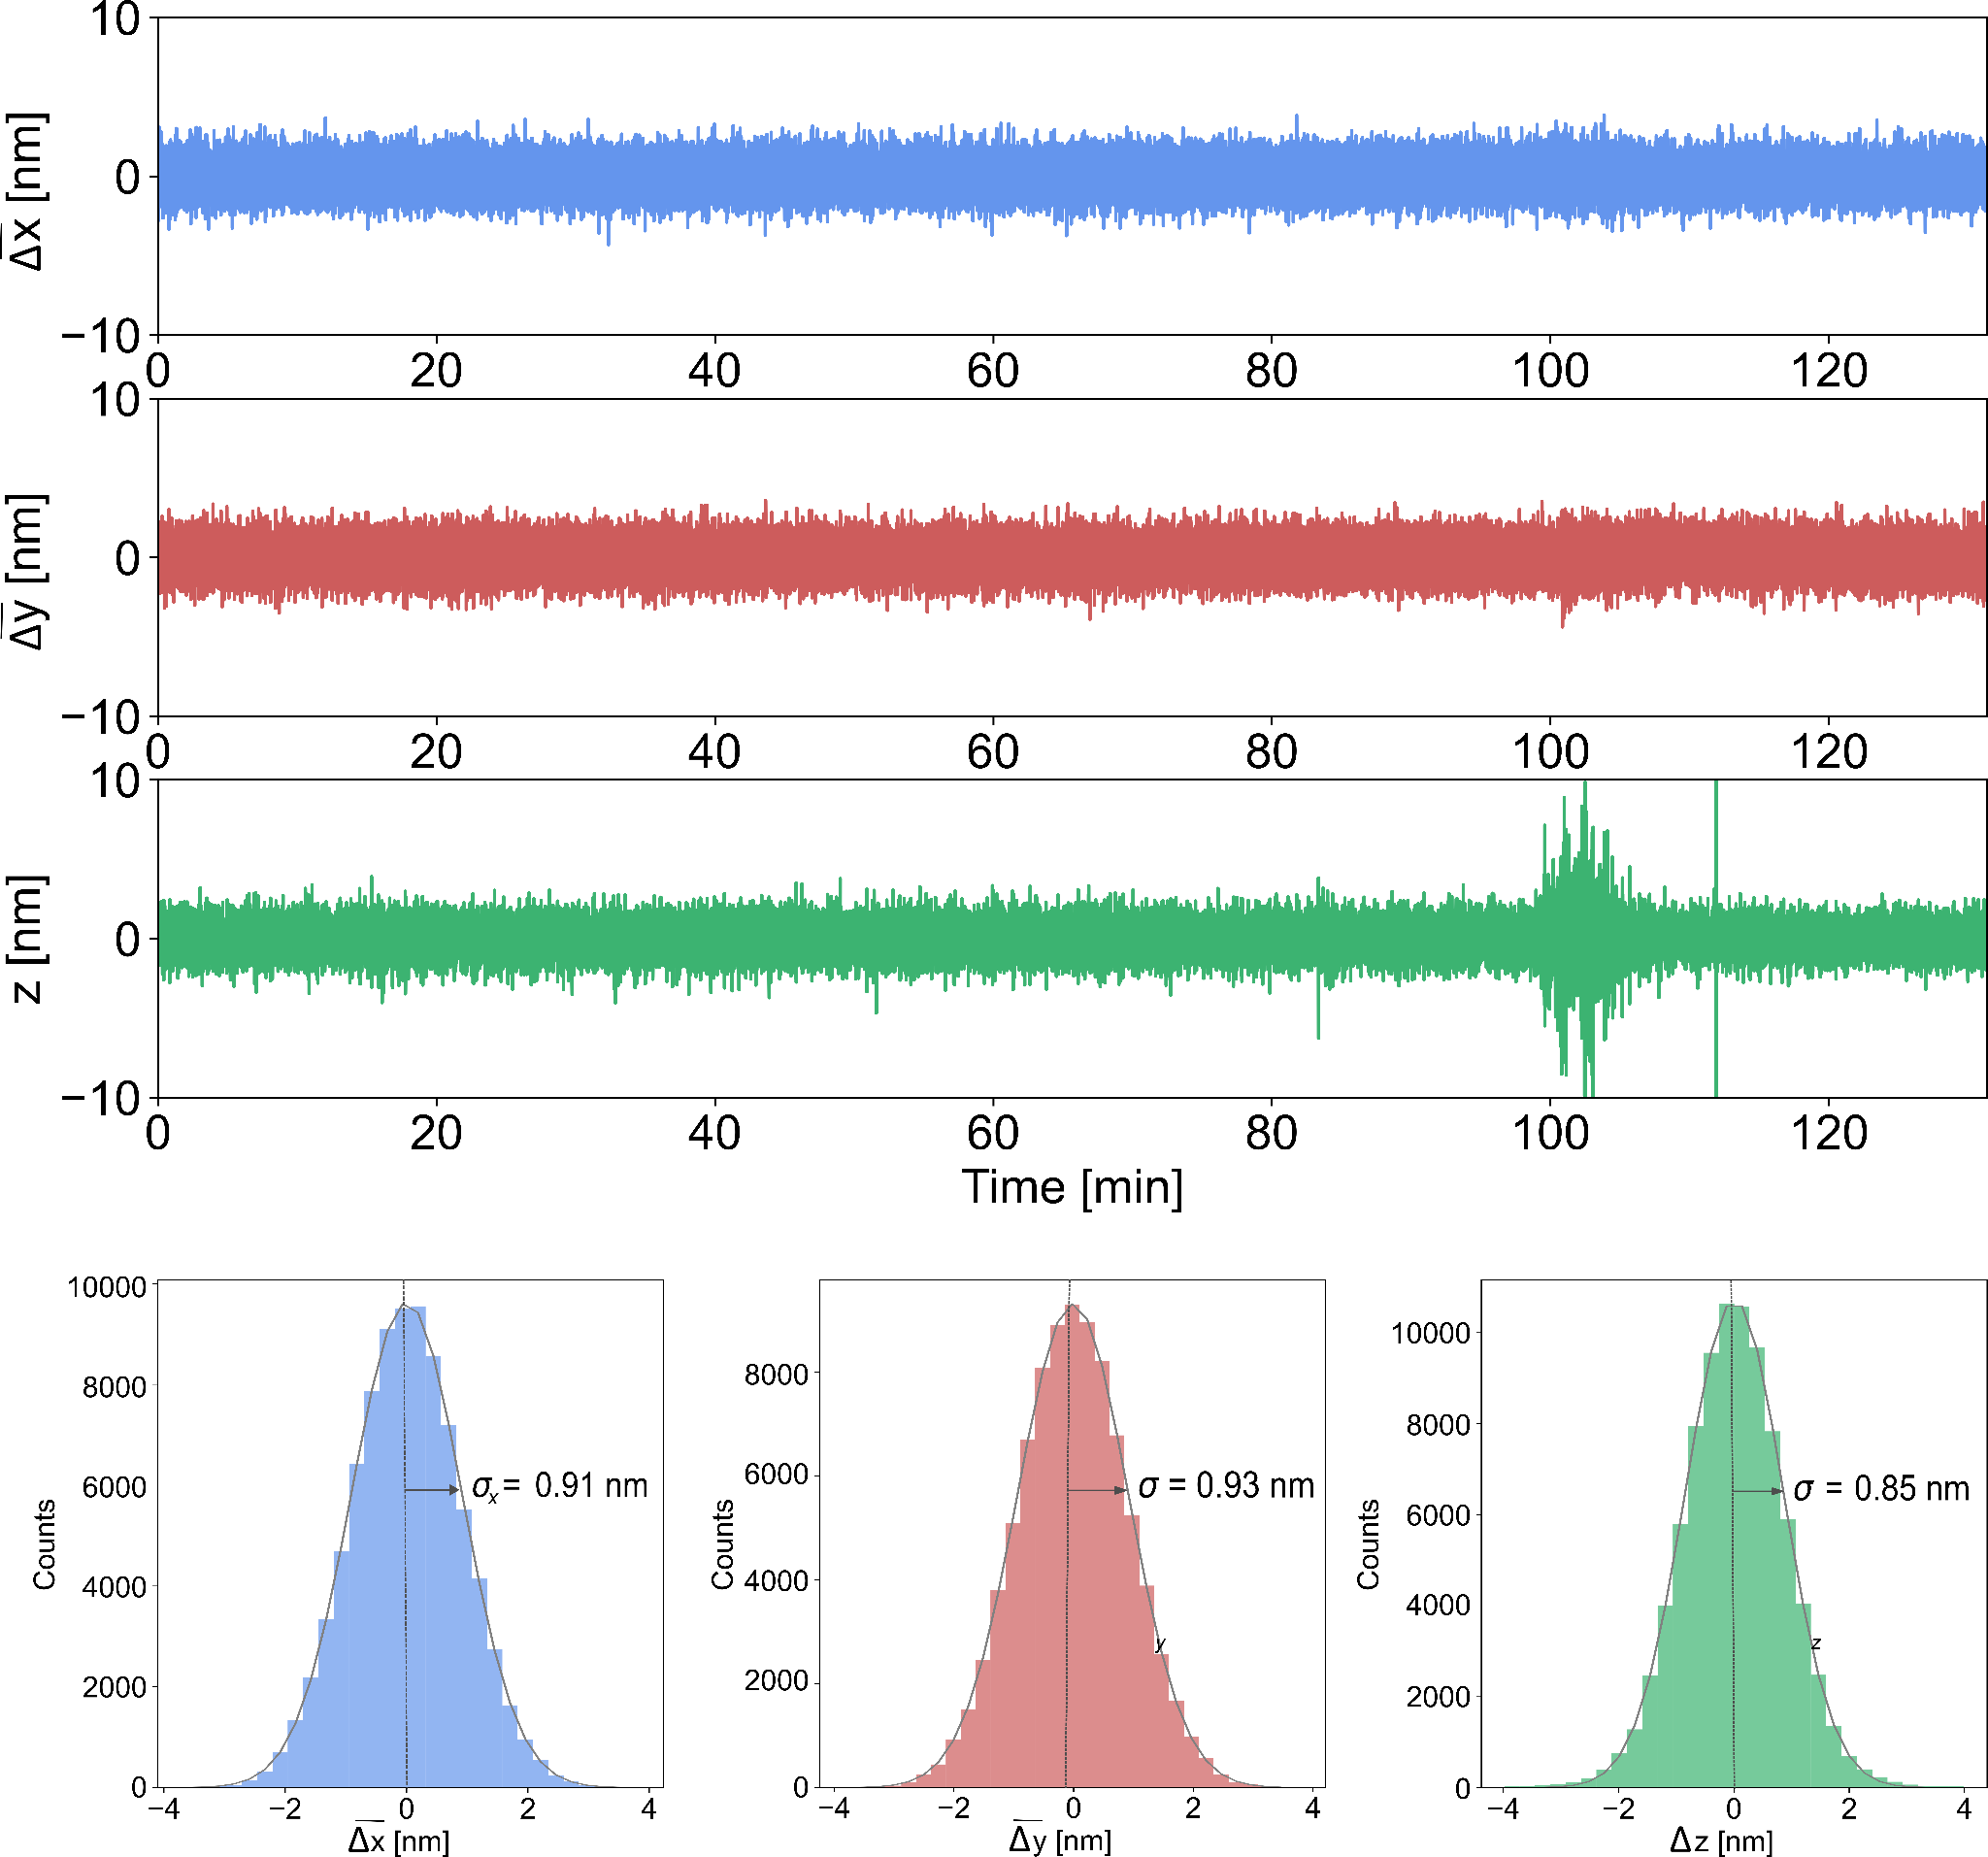


Figure S4. Performance of the stabilization system in the 3 dimensions for the p-MINFLUX setup. (A) Average displacements from the setpoint positions in X, Y and Z measured by the stabilization system for a period of 130 minutes using 7 AuNPs as fiducial markers. (B) Distribution of the displacements and gaussian fits (gray line) for each histogram. The parameter σ is the standard deviation of the gaussian fit and is indicated in each histogram.


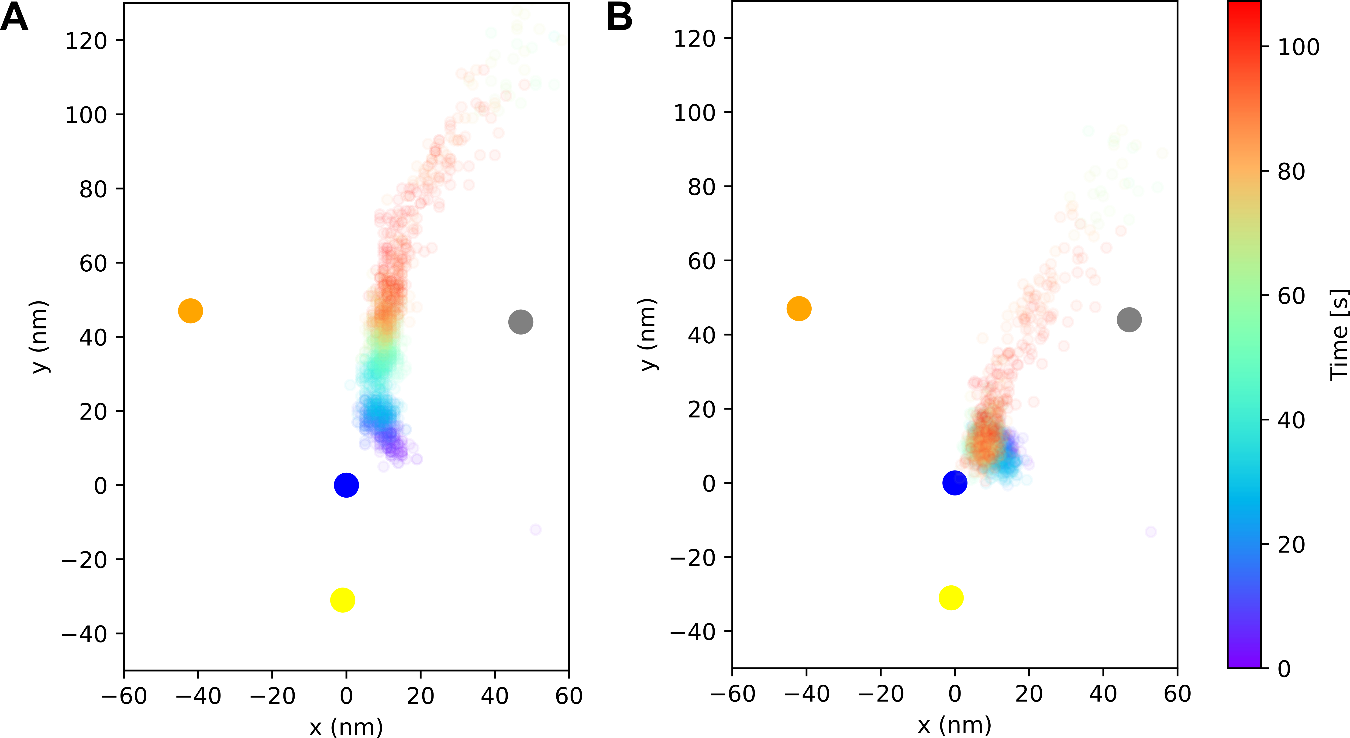


Figure S5. p-MINFLUX measurement with no active stabilization. (A) Localizations of a dynamic DNA origami structure with a single ATTO 643 fluorophore measured for 112 s (70 ms time bins, ). (B) Corrected localizations during post-processing using the measured XY drift data.

# Supplementary Tables

Table S1: DNA origami with a single ATTO 647N

| TAAAGACAAAGGCCGTAATAATTTTTTCAC |
| --- |
| TACCTGAGAACAAAATAACTATATAAAGAACG |
| GCACCAACATGACAACTCGGTTTATCAGCTTG |
| AGTACATAATTGCTTTAATAATGGCGAACGTT |
| GTACCGACAGCCAGTACGCAAGACGTAAATGC |
| CAGGCAAACGAAACGTTGAAGGGACCAGAGCA |
| GAATTGAGGAGGTGAGCAGAGATAATCCAGAA |
| AAACTATCGATTTAGTGCGCGTAACCACCA |
| ATCAAGAACAAAAGAATTCCTGATGAAGGAGC |
| CCAAGAAGACCGTGTATAAAGCGTGAATAA |
| GTGAGCCTCCTCACAGCGTGCCAGGCGGTATG |
| TTAAAAATAACAACTATTTACAAATGCACGTA |
| GCCGCCACTGGGAAGGTCTGCCAGAATTCGCG |
| CTGCCAGCTGAAATGTAAAGCAGCGCTTTC |
| AATTTTATCAGATAGCAATAGCAATATCACCG |
| AACATAGCATAAAGAAGAATATACGAGCCGTC |
| AATTTACCCTGTTTAGGAATCATCCTTGAA |
| GTTGGGCGGTTGTGTATCACGACGGAGGTGTC |
| CTCAGAAAGGCGGATCGTTCCAGAGGCAGG |
| TTCGAGCTTTAGTTTGTGGGGCGCATGCAATG |
| AGAATTAAAACAGGGAGAAGGCTTCAATAGCA |
| CTGTTTCCCGAGATATGAGAGAGTTGCAGC |
| AAATGAATGAGCGCTGCATGATAGTTTATT |
| TAAATCCGAACCGAACAGGACGGCGACAGA |
| TGATGCAGGGAACAAATTAAGTAAACAAAC |
| AAATACCCGGGTATTTATCAACTCCCAATC |
| GCCAGGGTGCAAGGCGACGGCGGACGTCGGAT |
| TGATAATCGTTCTAGCCGCAAGGAAGTAGTAG |
| GAATAGCCTGTGTGAAGTGAGCCATAAACA |
| TTTTGCGGCAGTCACACCACGCTGGGATTTTA |
| CACTCCAGCTCCGTGGACAGCGCCCGTCAGCG |
| GACGAGAACATAACGCAGACGACGATCAAAAA |
| TCCCGTATCATCATAGATGATGTGGGTAAC |
| CAGTACCCCGCCACCTAGTAAATGAATTTT |
| GGAGCACTACCGAACGAAGAATACAAGAACTC |
| CATAGGCTAGGGGGTAGTAGAAAGGAGTACCT |
| GCAAGGCATCGGCATGGAGGTTGTAAGCGT |
| CAATCAATTAAACACCGTATCATATTAATTAA |
| GTTGATATCTCAGGAGTAAACAACTTTCAACA |
| ATGAATCGTGGGCGCCAAAGGGCGAAAAACCG |
| ACCGATTGCGCCACCCAGCCACCAATTCTGAA |
| TCTGGTCCAACAGTGCGACCAGACAGGAAA |
| TTAATTGGTACGGTGATCATACTTGCGGGA |
| TTGTCACACATTGACATTTCGGTCGTTTTGCT |
| GTCTCGTCCAGCGCATGCTCGTTAACTCAC |
| CAATCGTCACGCGTGGCGGGGAAGAGCGGG |
| CAGCAAATCAAATATCAACCACCATATCAGAT |
| AAGCGGTCGCCTAATGAATTGTTACCTGCATC |
| TAGCAATGGAGCGGGGAAAGGA |
| TAGTCAGCATCAATTCCCAATTAATATGAT |
| CAAGATTCCGAGGAATAAGCCCATTAGAGC |
| AGATTCACAACAAAGAAAACCCTCATTTCAAT |
| AACTTAAAACCGTGCAGCGATCGGACCCCGGT |
| AGGGTAGCCAGCGAAAGAATAGAAAGGAACAA |
| TCTTCGCCAGTGCCACATTTGCGATGCTGA |
| CCTTGCTTACATCGGGAAATTATTCAATTCGA |
| TTAGGTTGTTCATCAAAATTATTCAATCAATA |
| TCAGAGCCGATTAGGATGATACAGCCAGAGCC |
| ACGACGAGCCAACATAATATATCCTCCGGC |
| CCTGAGTATTGTTAAATTTAAATTCCGGAAAC |
| AATAAGAAAATCGGCTAATAATATCCAGTTAC |
| CAGTACAAACTACAACGTGCCCGTAACCTATTCCGGAACC |
| ATTTCATCAACAAGCAAACATGTTAACGTCAA |
| ATTGTATAAGTCAAATTATTTTAAGAGCTGAA |
| AGACGATCGCTGGCAAGCAGCACACCGGAA |
| AGCCGGGAACCAGCTGTTAAACCGCCAGCA |
| CAGTTTGGTCGAATTCTCACTGCCGCTGGTAA |
| AAACTCCAAGTTGATTCTACTAATTAAAAATT |
| CAGCAAAACGTTTGCCAACCACCAGAGTGTAC |
| AACTAAACTCCTTTTACGAGAAAATGTTTA |
| CAAATAAGAATTGAGTACGCAATATATGGTTT |
| TGTTTTTAGCGCTTAAATCGGAACCCTAAAGG |
| GATGGCAAGGTTATATTAATTACAGGCAGAGG |
| GAGGACAGATGAACGGTGCGATTTTTGAGGAC |
| ACCAGCGGCCACCAGATCTTTTGACTCCTC |
| GACAGGAATGGTTGCTTTTTGGGGTCGAGG |
| AGCTAAACTTCCTCGTGCCCACTACGTGAACC |
| GACGACGAAGAGACGATAACCTACCGCAAG |
| TTTAGAAGTTTTGAATCCCTAAAAAACCGTTG |
| AAACTAGTAGCTATTAATACTTAGGCAAGG |
| CCTGGGGTCACGCTGGCCCTTATAAATCAAAA |
| TACCTTTTCTGTAAATAGATTAAGAGGCGTTA |
| GAGCCCCCGGCCTTGGAGGCCAAGCAGAAG |
| AACATAAACTGAACACTTAGCAAATATAAAAG |
| CGTGGACTCCAACGTCAGGGTGGTTTTTCTTT |
| CTTCACCGCGTTGCGCGTAATCATGCGCGCCT |
| TTTTCCCCGTCAGATATTGCGTTTTGAGGA |
| GATTAAGATTTTCATTACCATTAGGAGAAAGG |
| AAGAGAAGACCACCCTACGATCTAAAGTTTTG |
| TGCCGTAACCGCCAGCCCAGAATCTATTAACA |
| AATAGATACTGATAGGGCTATTTTGATTAG |
| ACAACATTTACCTTATGTACAGCTCCATGT |
| GGGAGTTTTTTTCATCGACCTGACCAGGCG |
| CCCACGCTCACTGTTTGCGGCCTCCCCGGG |
| TAATAACACGTGGCGACGCTAGGGCGCTGGCA |
| CAAGCCCAGTATTAAGACGGGGTCACCACCCT |
| GAAGCCTTTCCTGTAGTCATATGTTGCGGGCC |
| AACATTATGACCCTGTTTTGAGAGAAATATGC |
| TGGTGCTGACTGGTGTCGGTGCCCTCCGCTCA |
| GTTTCAGCGGAGTGAGACAGCATAGGTGTA |
| TTGCCGTTTGTGGTGCGCCCTGCGCGCTTTCC |
| ATAACCGAAAATACGTTATCATCGGAGTAATC |
| AATCGCGTGAATTACTTTTTAATTTAGTTA |
| AACGCTCAAATCAAGTTTTGACGAGCACGTAT |
| AACGTGCTAGGAGGCCCCTACATTACATTGGC |
| CCGCCTGAGTTGGCATGAGTAACTGATTGT |
| GACAATATTATTAGACATAGATTAAGTAACAG |
| TTACCGATCCAGAGCTTACCAAGTAGAAAC |
| TCCCTTACGTCTGGTCGCCTCCGGTAGCTCTC |
| AATCAAAATCCAATAATCTGGAAGTAATGCCG |
| CAGAGCACAGATATAAGCGCATGCTGAATA |
| CAGTCTCTGATTTTGCGTTTAGTACCGCCACC |
| ATCAAGTTGCACCGTATGGCAACACGTAGAAA |
| CCCACAAGAAACGATTTTTTGAAGTACCGCAC |
| GGTCTGAGTACTTCTGGAATACCAGTTGAAAG |
| AGTGTAGCGTCCATCACTGAGTAGGTGGCACA |
| GAGCCTTGAGATTTGAATGCCAGTAAATTG |
| GAGAGGGCATGTCAACCAGCTTAGATGGGC |
| TCACCAGAAACCTGTTTGAGGAAGAATGCG |
| CTCAGAACAGGGAGGGAGGTGAATTAGCTATC |
| ACAAATTCACAAGAAAGTCTTTCCCCAGCTAC |
| GACTGGATAGCGTCCAAAAACGAAGTCATTTT |
| TTTAGAAGAACGCCACCCAAAACAGGCTGC |
| CCGGAGACAGCAAATATCAGCTCAGAAGATCG |
| GCCGCCAGATCAATAGAGCACCATAGAGATAA |
| TCTATCAGGGCGATGTAGAATCGAGGCGGT |
| TGAGTTTTATTTCGGATAAACACCGCCACC |
| TAACAACCAATAAACAGCCGTTGCGAACCT |
| GTGCACTCCCGGCAAACCGTCGGTGAGGTGGA |
| GCCTCCCTTCATTAAAAGGTAATTTTAAGA |
| CATTAACAATCAGGTCGGATTAGAATTCATCA |
| ACGGAAAACAGTATCCGCCATTACAGGAAG |
| TGGTAATTTAGCGTACATTTTCAGGGATAG |
| CTTATTAGTCACCAGTAAAATTCAATAACGGA |
| TTGTGAATATTACAGATAGTAATGACCATA |
| GCATCGTATTTCTGCTAGCTTTCAGGTGCCAT |
| ATACCCAAGCGGGAGGTTTTGTTTCAGCTAAT |
| AAGGAAAAGTTGCTATTATTTAAATAGATA |
| AAACAGAAGATAGCTTCGTCGCTATGCGTTAT |
| TCACCGACGGAACCAGTCAGAGCCAGTGCCTT |
| GATAGTTGCGCCGACACTAAAACGCAAGCGCGACCCAAAT |
| AAAAATCTATACCAGTCTGACCAACGGTCAAT |
| AAAATAAAAACAATGACGAACAAAGACATTCA |
| CTTATTACACGCGAGGCCTTTACACTGTCCAG |
| TTAAACAGTTCAGAAAGATAAGAGCTAACGGA |
| ATTAAATGTGAGCGAGATGAACGGGAAAGGGG |
| TTGGATTAAGACTACCCTTTTTTAGCCATATT |
| GTTGAGATATGGTTTATTCATCAACCTGATAA |
| GGGTAATAATAGCAGCGTTTTATTTATTTT |
| CAACGTAACGTTTACCCAAAAGGACGTTTTAA |
| ATAAATACATAAAGGATCAGTATTGGGAAG |
| CCAATAGCCCTCATACACCATCCTGCGAAC |
| CAATATTAAGCACTAATGCGCCGCTACAGGGC |
| TCATCGAGTTCTGACCTGAGAATCATGGAAAC |
| TACCGAGCAACAAGAGGCAACAGCTGATTGCC |
| CATCGTAGCTTTTTCAGTAATTTATTTAACAA |
| AAGAGTCCCATATCAAGAAACATATCTTTA |
| ATAAAACAGAAGGTTACCTTTGCCAAGGGTTA |
| ACCCTCAGAACGGCTAGGCGCAGACTTTGAAA |
| TACTTAGCCGGAACGACAGAGGCTTAAGAACT |
| CTCATAGAAGTTTTAAGGCTGACATAATCA |
| AGCAAATTAAAGCTAGCCTGAGAATATAAA |
| CTGACCTTATTAAATTCTAAAAATAACGGA |
| CTGTATGGGAATTTACAAGTGCCGCTGTAGCG |
| TACAACGTAATTGTAAACCATCGCCCACGC |
| GCGTACTACGGTACGCATTGCATAATAAAA |
| ATCACCCATGGAAATAGATTAAAGAGAGCCAG |
| AGTCCTGATTACCAGTGATAAATAACGCTGAG |
| TTCTAAGAGCAGTATGCCTGAACAGAAACCAT |
| TCACCGTAAAGTATAGGCCAGAATCAAACAAA |
| ATTCAACCAGAAAAGCTCAAAAATTTTGAGGG |
| CAGAGCCCCAAAGACTTTGGGAAATAATAA |
| CAATTCCAGGCAAAATTTTGCCCC |
| AACAGTAGCGCCTGTTAAACCAAGCCTTAAAT |
| CAGCATCATCCGCCGGGTCATACCTCGCGTCC |
| TTTGCCAGGGCTGACCATTTCAACTTCCATTA |
| GTTGAAAAGAAATCCGGAGGAAGTTTTAATCA |
| CCGGCGAATCACTTGCCGCAAATTCATCGCCA |
| TTGCGTATGCCAACGCCCTGTTCTGGGGGTTT |
| TTCGCCTGAATCAATAATTTATCAATGGTTTG |
| TCAGACGAAGACACCATCACCAATAAGTCAGA |
| CGACGGCTATTACGCTTGGTGTTCATCAAC |
| GCGGGCCGTTTTCACGGCGCGGTTCTGCATTA |
| CATTTTCGAAAAGGTAACCGCGCCATCCGGTA |
| GAGTAACAGCCTGTAGCCATGTACCGTAACAC |
| CAAAGAATTAGCAAAACATGTTTTATCTACAA |
| AAATCACCTTGAGCCAAAAAGGGCGTTACCAG |
| ACAATCGGGCGCCATTGGCCTCAGTTTTTTAA |
| CGAGAAAAGAATCATTAAGTAATTGAGAGAAT |
| TTTCATTCAGAGGCGTATAATCCATTATCA |
| CTAAAGGAATTGCGAACTTTTGCGGGATCGTC |
| AAGGTGGAAGCAAAGAACCAGATCAACTAA |
| GGAATTAAAAAAAGCATTGCAGTCACCTTG |
| CATACATGCCAGACGTCTCAGAACCGCCACCC |
| CGTTTTCCGGAAACGCGGAATATAAGACTC |
| GAGCAAGACAGCCATATTTTGCACTTATCATT |
| TGCGGATGTAGCTCAATTAAGCAAGTACCAAA |
| CACCCGCCTAATCAGTCTGGTAATGAACCCTT |
| CTTTCGAGGATTATACAAAGAGGCCTTGCCCT |
| GAACCTAAATAGTGATATGTGACAACGCTC |
| AATGGGATAGGTCACGCAGCTGGCTAATCGTA |
| AGGCTATCGAGAATCGTAACAACCTTGACCGT |
| ATACATATTCATTGACTTAATTTAGACGGG |
| TTGACAAGCGAGAGGACCACATCCGGAAGC |
| TCTGGCCTTATTTCAATGATAAATTTTCATTC |
| CGATAGCATGCCTTTAGATATTCAGGAAAGCG |
| TGCAGATAACACCAGATATTCATTAAACAAAG |
| TCTCCGTAATCCAATATAAGAGAGTCTGGA |
| GAGTAGATTCAAAGCGCGGATTGCATAAAAAC |
| CTGAACCTGAAAAATCGATTATTTTTGACGCT |
| ATTAATTTCTGGCCAAGCGGTCAGCTGAGAAG |
| AGTCGGGTGAGACGGTCCACTATTAAAGAA |
| AAACGCAATTGGCCTTGCGTCAGATCGAGAGG |
| ATTGTGTCTCTCCAAAGTCGCTGAGGCTTGCA |
| AGTGATGAAGGGTAAATACGGCTGTTGTAAAA |
| AATGCCAAGGTTTCTTGTGTCACTGGTCATAG |
| CATAAGGTCATTAAACCCGGAATCGGAACG |
| CATCCTCAAGCGGTGCGTTCAGCAGTGTAAAG |
| AAAGTAAGCCTGAATCCTAATTTGCCCATCCT |
| GGGACATTTAAAAGTTAATCAACAAGTTACAA |
| CCCGACTTAAGAACTGAATATCAGTACCATTA |
| TCGTCTTTGCTTTTGATTAGCGGGATAGCCCC |
| MODIFIED |
| CAACTCGGAAAGCGTAACCACCCCGAGTAATTT**[ATTO542]** |
| CAAAATAGAACCGGAACGAGTACTACGAAGTTT**[ATTO647N]** |
| **[biotin]**TTTAAGAGTCTGGTCACGCAGCTTGACGGGGAAAG |
| **[biotin]**TTTACATGAAAATAGGAACCATTCCACAGACAGCC |
| **[biotin]**TTTGCAGAACGGGCTTAATTAAATTTAAAATCATA |
| **[biotin]**TTTGCAAACAAAGGTCATTAATCGGTTTAAAGCCT |
| **[biotin]**TTTATTAATTGCCTGGCCCGGGTTGAGTGTTGTTC |
| **[biotin]**TTTAACGGGTATATATTCGAAAAAGGCTCCAAAAG |

Table S2: Dynamic DNA origami with a single ATTO 643

| TAAAGACAAAGGCCGTAATAATTTTTTCAC |
| --- |
| TACCTGAGAACAAAATAACTATATAAAGAACG |
| GCACCAACATGACAACTCGGTTTATCAGCTTG |
| AGTACATAATTGCTTTAATAATGGCGAACGTT |
| GTACCGACAGCCAGTACGCAAGACGTAAATGC |
| CAGGCAAACGAAACGTTGAAGGGACCAGAGCA |
| GAATTGAGGAGGTGAGCAGAGATAATCCAGAA |
| AAACTATCGATTTAGTGCGCGTAACCACCA |
| ATCAAGAACAAAAGAATTCCTGATGAAGGAGC |
| CCAAGAAGACCGTGTATAAAGCGTGAATAA |
| GTGAGCCTCCTCACAGCGTGCCAGGCGGTATG |
| TTAAAAATAACAACTATTTACAAATGCACGTA |
| GCACTCAAGCGGGGTCCGCACAGGTAAAAAAA |
| CTGCCAGCTGAAATGTAAAGCAGCGCTTTC |
| TGGGTAAACGGCAGCACGCGGTCCGCGGATCA |
| AATTTTATCAGATAGCAATAGCAATATCACCG |
| AACATAGCATAAAGAAGAATATACGAGCCGTC |
| AATTTACCCTGTTTAGGAATCATCCTTGAA |
| GTTGGGCGGTTGTGTATCACGACGGAGGTGTC |
| CTCAGAAAGGCGGATCGTTCCAGAGGCAGG |
| TTCGAGCTTTAGTTTGTGGGGCGCATGCAATG |
| AGAATTAAAACAGGGAGAAGGCTTCAATAGCA |
| GAGAGGGCATGTCAACCAGCTTAGATGGGC |
| CTCAGAACAGGGAGGGAGGTGAATTAGCTATC |
| CTGTTTCCCGAGATATGAGAGAGTTGCAGC |
| AAATGAATGAGCGCTGCATGATAGTTTATT |
| TAAATCCGAACCGAACAGGACGGCGACAGA |
| TGATGCAGGGAACAAATTAAGTAAACAAAC |
| AAATACCCGGGTATTTATCAACTCCCAATC |
| GCCAGGGTGCAAGGCGACGGCGGACGTCGGAT |
| CAACTCGGAAAGCGTAACCACCCCGAGTAA |
| GAATAGCCTGTGTGAAGTGAGCCATAAACA |
| TTTTGCGGCAGTCACACCACGCTGGGATTTTA |
| CACTCCAGCTCCGTGGACAGCGCCCGTCAGCG |
| GACGAGAACATAACGCAGACGACGATCAAAAA |
| TCCCGTATCATCATAGATGATGTGGGTAAC |
| CAGTACCCCGCCACCTAGTAAATGAATTTT |
| GGAGCACTACCGAACGAAGAATACAAGAACTC |
| CATAGGCTAGGGGGTAGTAGAAAGGAGTACCT |
| GCAAGGCATCGGCATGGAGGTTGTAAGCGT |
| CAATCAATTAAACACCGTATCATATTAATTAA |
| GTTGATATCTCAGGAGTAAACAACTTTCAACA |
| ATGAATCGTGGGCGCCAAAGGGCGAAAAACCG |
| ACCGATTGCGCCACCCAGCCACCAATTCTGAA |
| TCTGGTCCAACAGTGCGACCAGACAGGAAA |
| TTGTCACACATTGACATTTCGGTCGTTTTGCT |
| GTCTCGTCCAGCGCATGCTCGTTAACTCAC |
| CAATCGTCACGCGTGGCGGGGAAGAGCGGG |
| CAGCAAATCAAATATCAACCACCATATCAGAT |
| AAGCGGTCGCCTAATGAATTGTTACCTGCATC |
| TAGCAATGGAGCGGGGAAAGGA |
| TAGTCAGCATCAATTCCCAATTAATATGAT |
| CAAGATTCCGAGGAATAAGCCCATTAGAGC |
| AGATTCACAACAAAGAAAACCCTCATTTCAAT |
| AACTTAAAACCGTGCAGCGATCGGACCCCGGT |
| AGGGTAGCCAGCGAAAGAATAGAAAGGAACAA |
| TCTTCGCCAGTGCCACATTTGCGATGCTGA |
| CCTTGCTTACATCGGGAAATTATTCAATTCGA |
| TTAGGTTGTTCATCAAAATTATTCAATCAATA |
| TCAGAGCCGATTAGGATGATACAGCCAGAGCC |
| ACGACGAGCCAACATAATATATCCTCCGGC |
| GCAACTGTGGGAACGGCAGAAACAGTTTTTTC |
| CCTGAGTATTGTTAAATTTAAATTCCGGAAAC |
| AATAAGAAAATCGGCTAATAATATCCAGTTAC |
| CAGTACAAACTACAACGTGCCCGTAACCTATTCCGGAACC |
| ATTTCATCAACAAGCAAACATGTTAACGTCAA |
| ATTGTATAAGTCAAATTATTTTAAGAGCTGAA |
| AGACGATCGCTGGCAAGCAGCACACCGGAA |
| AGCCGGGAACCAGCTGTTAAACCGCCAGCA |
| CAGTTTGGTCGAATTCTCACTGCCGCTGGTAA |
| CAGCAAAACGTTTGCCAACCACCAGAGTGTAC |
| AGGCTATCGAGAATCGTAACAACCTTGACCGT |
| AACTAAACTCCTTTTACGAGAAAATGTTTA |
| CAAATAAGAATTGAGTACGCAATATATGGTTT |
| TGTTTTTAGCGCTTAAATCGGAACCCTAAAGG |
| GATGGCAAGGTTATATTAATTACAGGCAGAGG |
| GAGGACAGATGAACGGTGCGATTTTTGAGGAC |
| ACCAGCGGCCACCAGATCTTTTGACTCCTC |
| GACAGGAATGGTTGCTTTTTGGGGTCGAGG |
| AGCTAAACTTCCTCGTGCCCACTACGTGAACC |
| GACGACGAAGAGACGATAACCTACCGCAAG |
| TTTAGAAGTTTTGAATCCCTAAAAAACCGTTG |
| CCTGGGGTCACGCTGGCCCTTATAAATCAAAA |
| TACCTTTTCTGTAAATAGATTAAGAGGCGTTA |
| GAGCCCCCGGCCTTGGAGGCCAAGCAGAAG |
| AACATAAACTGAACACTTAGCAAATATAAAAG |
| CGTGGACTCCAACGTCAGGGTGGTTTTTCTTT |
| CTTCACCGCGTTGCGCGTAATCATGCGCGCCT |
| TTTTCCCCGTCAGATATTGCGTTTTGAGGA |
| GATTAAGATTTTCATTACCATTAGGAGAAAGG |
| AAGAGAAGACCACCCTACGATCTAAAGTTTTG |
| TGCCGTAACCGCCAGCCCAGAATCTATTAACA |
| AATAGATACTGATAGGGCTATTTTGATTAG |
| ACAACATTTACCTTATGTACAGCTCCATGT |
| GGGAGTTTTTTTCATCGACCTGACCAGGCG |
| CCCACGCTCACTGTTTGCGGCCTCCCCGGG |
| CAAAATAGAACCGGAACGAGTACTACGAAG |
| TAATAACACGTGGCGACGCTAGGGCGCTGGCA |
| CAAGCCCAGTATTAAGACGGGGTCACCACCCT |
| GAAGCCTTTCCTGTAGTCATATGTTGCGGGCC |
| AACATTATGACCCTGTTTTGAGAGAAATATGC |
| TGGTGCTGACTGGTGTCGGTGCCCTCCGCTCA |
| GTTTCAGCGGAGTGAGACAGCATAGGTGTA |
| TTGCCGTTTGTGGTGCGCCCTGCGCGCTTTCC |
| ATAACCGAAAATACGTTATCATCGGAGTAATC |
| AATCGCGTGAATTACTTTTTAATTTAGTTA |
| AACGCTCAAATCAAGTTTTGACGAGCACGTAT |
| AACGTGCTAGGAGGCCCCTACATTACATTGGC |
| CCGCCTGAGTTGGCATGAGTAACTGATTGT |
| GACAATATTATTAGACATAGATTAAGTAACAG |
| TTACCGATCCAGAGCTTACCAAGTAGAAAC |
| TCCCTTACGTCTGGTCGCCTCCGGTAGCTCTC |
| AATCAAAATCCAATAATCTGGAAGTAATGCCG |
| CAGAGCACAGATATAAGCGCATGCTGAATA |
| CAGTCTCTGATTTTGCGTTTAGTACCGCCACC |
| ATCAAGTTGCACCGTATGGCAACACGTAGAAA |
| CCCACAAGAAACGATTTTTTGAAGTACCGCAC |
| GGTCTGAGTACTTCTGGAATACCAGTTGAAAG |
| AGTGTAGCGTCCATCACTGAGTAGGTGGCACA |
| GAGCCTTGAGATTTGAATGCCAGTAAATTG |
| TCACCAGAAACCTGTTTGAGGAAGAATGCG |
| ACAAATTCACAAGAAAGTCTTTCCCCAGCTAC |
| GACTGGATAGCGTCCAAAAACGAAGTCATTTT |
| TTTAGAAGAACGCCACCCAAAACAGGCTGC |
| CCGGAGACAGCAAATATCAGCTCAGAAGATCG |
| GCCGCCAGATCAATAGAGCACCATAGAGATAA |
| TCTATCAGGGCGATGTAGAATCGAGGCGGT |
| TGAGTTTTATTTCGGATAAACACCGCCACC |
| TAACAACCAATAAACAGCCGTTGCGAACCT |
| GTGCACTCCCGGCAAACCGTCGGTGAGGTGGA |
| GCCTCCCTTCATTAAAAGGTAATTTTAAGA |
| CATTAACAATCAGGTCGGATTAGAATTCATCA |
| ACGGAAAACAGTATCCGCCATTACAGGAAG |
| TGGTAATTTAGCGTACATTTTCAGGGATAG |
| CTTATTAGTCACCAGTAAAATTCAATAACGGA |
| TTGTGAATATTACAGATAGTAATGACCATA |
| GCATCGTATTTCTGCTAGCTTTCAGGTGCCAT |
| ATACCCAAGCGGGAGGTTTTGTTTCAGCTAAT |
| AAGGAAAAGTTGCTATTATTTAAATAGATA |
| AAACAGAAGATAGCTTCGTCGCTATGCGTTAT |
| TCACCGACGGAACCAGTCAGAGCCAGTGCCTT |
| GATAGTTGCGCCGACACTAAAACGCAAGCGCGACCCAAAT |
| AAAAATCTATACCAGTCTGACCAACGGTCAAT |
| AAAATAAAAACAATGACGAACAAAGACATTCA |
| CTTATTACACGCGAGGCCTTTACACTGTCCAG |
| TAATGCTGGCTTAGAGATCCCCCTGAATCGTC |
| TTAAACAGTTCAGAAAGATAAGAGCTAACGGA |
| ATTAAATGTGAGCGAGATGAACGGGAAAGGGG |
| AATGCCAAGGTTTCTTGTGTCACTGGTCATAG |
| TTGGATTAAGACTACCCTTTTTTAGCCATATT |
| GTTGAGATATGGTTTATTCATCAACCTGATAA |
| GGGTAATAATAGCAGCGTTTTATTTATTTT |
| CAACGTAACGTTTACCCAAAAGGACGTTTTAA |
| ATAAATACATAAAGGATCAGTATTGGGAAG |
| CCAATAGCCCTCATACACCATCCTGCGAAC |
| CAATATTAAGCACTAATGCGCCGCTACAGGGC |
| TCATCGAGTTCTGACCTGAGAATCATGGAAAC |
| TACCGAGCAACAAGAGGCAACAGCTGATTGCC |
| CATCGTAGCTTTTTCAGTAATTTATTTAACAA |
| AAGAGTCCCATATCAAGAAACATATCTTTA |
| ATAAAACAGAAGGTTACCTTTGCCAAGGGTTA |
| ACCCTCAGAACGGCTAGGCGCAGACTTTGAAA |
| TACTTAGCCGGAACGACAGAGGCTTAAGAACT |
| CTCATAGAAGTTTTAAGGCTGACATAATCA |
| AGCAAATTAAAGCTAGCCTGAGAATATAAA |
| CTGACCTTATTAAATTCTAAAAATAACGGA |
| CTGTATGGGAATTTACAAGTGCCGCTGTAGCG |
| TACAACGTAATTGTAAACCATCGCCCACGC |
| GCGTACTACGGTACGCATTGCATAATAAAA |
| ATCACCCATGGAAATAGATTAAAGAGAGCCAG |
| AGTCCTGATTACCAGTGATAAATAACGCTGAG |
| GCCGCCACTGGGAAGGTCTGCCAGAATTCGCG |
| TTCTAAGAGCAGTATGCCTGAACAGAAACCAT |
| GATGTGCTTTTCCCAGCATCGACACGGCCTTT |
| TCACCGTAAAGTATAGGCCAGAATCAAACAAA |
| ATTCAACCAGAAAAGCTCAAAAATTTTGAGGG |
| CAGAGCCCCAAAGACTTTGGGAAATAATAA |
| CAATTCCAGGCAAAATTTTGCCCC |
| AACAGTAGCGCCTGTTAAACCAAGCCTTAAAT |
| CAGCATCATCCGCCGGGTCATACCTCGCGTCC |
| TTTGCCAGGGCTGACCATTTCAACTTCCATTA |
| GTTGAAAAGAAATCCGGAGGAAGTTTTAATCA |
| CCGGCGAATCACTTGCCGCAAATTCATCGCCA |
| TTGCGTATGCCAACGCCCTGTTCTGGGGGTTT |
| TTCGCCTGAATCAATAATTTATCAATGGTTTG |
| TCAGACGAAGACACCATCACCAATAAGTCAGA |
| CGACGGCTATTACGCTTGGTGTTCATCAAC |
| GCGGGCCGTTTTCACGGCGCGGTTCTGCATTA |
| CATTTTCGAAAAGGTAACCGCGCCATCCGGTA |
| GAGTAACAGCCTGTAGCCATGTACCGTAACAC |
| CAAAGAATTAGCAAAACATGTTTTATCTACAA |
| AAATCACCTTGAGCCAAAAAGGGCGTTACCAG |
| ACAATCGGGCGCCATTGGCCTCAGTTTTTTAA |
| CGAGAAAAGAATCATTAAGTAATTGAGAGAAT |
| TTTCATTCAGAGGCGTATAATCCATTATCA |
| CTAAAGGAATTGCGAACTTTTGCGGGATCGTC |
| AAGGTGGAAGCAAAGAACCAGATCAACTAA |
| GGAATTAAAAAAAGCATTGCAGTCACCTTG |
| CATACATGCCAGACGTCTCAGAACCGCCACCC |
| CGTTTTCCGGAAACGCGGAATATAAGACTC |
| GAGCAAGACAGCCATATTTTGCACTTATCATT |
| TGCGGATGTAGCTCAATTAAGCAAGTACCAAA |
| CACCCGCCTAATCAGTCTGGTAATGAACCCTT |
| CTTTCGAGGATTATACAAAGAGGCCTTGCCCT |
| GAACCTAAATAGTGATATGTGACAACGCTC |
| AATGGGATAGGTCACGCAGCTGGCTAATCGTA |
| ATACATATTCATTGACTTAATTTAGACGGG |
| TTGACAAGCGAGAGGACCACATCCGGAAGC |
| TCTGGCCTTATTTCAATGATAAATTTTCATTC |
| CGATAGCATGCCTTTAGATATTCAGGAAAGCG |
| TGCAGATAACACCAGATATTCATTAAACAAAG |
| TCTCCGTAATCCAATATAAGAGAGTCTGGA |
| GAGTAGATTCAAAGCGCGGATTGCATAAAAAC |
| CTGAACCTGAAAAATCGATTATTTTTGACGCT |
| ATTAATTTCTGGCCAAGCGGTCAGCTGAGAAG |
| AGTCGGGTGAGACGGTCCACTATTAAAGAA |
| AAACGCAATTGGCCTTGCGTCAGATCGAGAGG |
| ATTGTGTCTCTCCAAAGTCGCTGAGGCTTGCA |
| AGTGATGAAGGGTAAATACGGCTGTTGTAAAA |
| CATAAGGTCATTAAACCCGGAATCGGAACG |
| GGCTCATTACGTTAATATACTGCGCAAATGCT |
| CATCCTCAAGCGGTGCGTTCAGCAGTGTAAAG |
| AAAGTAAGCCTGAATCCTAATTTGCCCATCCT |
| GGGACATTTAAAAGTTAATCAACAAGTTACAA |
| CCCGACTTAAGAACTGAATATCAGTACCATTA |
| TCGTCTTTGCTTTTGATTAGCGGGATAGCCCC |
| MODIFIED |
| AAACTCCAAGTTGATTCTACTAATAGTAGTAGTTTTTTTTTCGGGCATTTA **[At643]** |
| GGCTTGAGTTAGGAATCTTTTGCAAAAGAAGTTTTTAAATGC |
| AAACTAGTAGCTATTAATACTTTTGCGGGATTTTAAATGC |
| CATATAACACAGGTCATTTACCCTGACTATTA |
| TGATAATCGTTCTAGCCGCAAGGATAAAAATT |
| TTAATTGGTACGGTGATCATACAGGCAAGG |
| **[biotin]**TTTAAGAGTCTGGTCACGCAGCTTGACGGGGAAAG |
| **[biotin]**TTTACATGAAAATAGGAACCATTCCACAGACAGCC |
| **[biotin]**TTTGCAGAACGGGCTTAATTAAATTTAAAATCATA |
| **[biotin]**TTTGCAAACAAAGGTCATTAATCGGTTTAAAGCCT |
| **[biotin]**TTTATTAATTGCCTGGCCCGGGTTGAGTGTTGTTC |
| **[biotin]**TTTAACGGGTATATATTCGAAAAAGGCTCCAAAAG |
